# Supplementary material for: Little evidence for switches to environmental sex determination and turnover of sex chromosomes in lacertid lizards
Source: PubMed Central journal article supplement (PMC6534595; doi:10.1038/s41598-019-44192-5), 2019-05-24
Supplement: 41598_2019_44192_MOESM1_ESM.pdf [file 41598_2019_44192_MOESM1_ESM.pdf]

Supplementary information to:

**Little evidence for switches to environmental sex determination and turnover of sex chromosomes in lacertid lizards**

Michail Rovatsos, Jasna Vukić, Agata Mrugała, Grzegorz Suwala, Petros Lymberakis, Lukáš Kratochvíl

**Table S1.** List of samples of lacertids and their outgroups used in the study.

| Family     | Subfamily    | Species                           | Sex |   |
|------------|--------------|-----------------------------------|-----|---|
|            |              |                                   | ♂   | ♀ |
| Teiidae    | Teiinae      | <i>Cnemidophorus deppei</i>       | 1   | 1 |
| Teiidae    | Tupinambinae | <i>Tupinambis merianae</i>        | 1   | 1 |
| Teiidae    | Tupinambinae | <i>Dracaena guianensis</i>        | 1   | 1 |
| Blanidae   | Blaninae     | <i>Blanus strauchi</i>            | 1   | 1 |
| Blanidae   | Blaninae     | <i>Blanus cinereus</i>            | 1   | 1 |
| Lacertidae | Gallotiinae  | <i>Psammodromus hispanicus</i>    | 1   | 1 |
| Lacertidae | Gallotiinae  | <i>Psammodromus algirus</i>       | 1   | 1 |
| Lacertidae | Gallotiinae  | <i>Gallotia stehlini</i>          | 1   | 1 |
| Lacertidae | Lacertinae   | <i>Atlantolacerta andreanskyi</i> | 1   | 1 |
| Lacertidae | Lacertinae   | <i>Nucras intertexta</i>          | 1   | 1 |
| Lacertidae | Lacertinae   | <i>Nucras taeniolata</i>          | 1   | 1 |
| Lacertidae | Lacertinae   | <i>Vhembelacerta rupicola</i>     | 1   | 1 |
| Lacertidae | Lacertinae   | <i>Meroles squamulosus</i>        | 1   | 1 |
| Lacertidae | Lacertinae   | <i>Pedioplanis lineocellata</i>   | 1   | 1 |
| Lacertidae | Lacertinae   | <i>Mesalina guttulata</i>         | 1   | 1 |
| Lacertidae | Lacertinae   | <i>Acanthodactylus schreiberi</i> | 1   | 1 |
| Lacertidae | Lacertinae   | <i>Phoenicolacerta troodica</i>   | 1   | 1 |
| Lacertidae | Lacertinae   | <i>Timon lepidus</i>              | 1   | 1 |
| Lacertidae | Lacertinae   | <i>Lacerta schreiberi</i>         | 1   | 1 |
| Lacertidae | Lacertinae   | <i>Lacerta trilineata</i>         | 1   | 1 |
| Lacertidae | Lacertinae   | <i>Teira dugesii</i>              | 1   | 1 |
| Lacertidae | Lacertinae   | <i>Scelarcis perspicillata</i>    | 1   | 1 |
| Lacertidae | Lacertinae   | <i>Podarcis pityusensis</i>       | 1   | 1 |
| Lacertidae | Lacertinae   | <i>Podarcis bocagei</i>           | 1   | 1 |
| Lacertidae | Lacertinae   | <i>Apathya cappadocica</i>        | 1   | 1 |
| Lacertidae | Lacertinae   | <i>Iberolacerta monticola</i>     | 1   | 1 |
| Lacertidae | Lacertinae   | <i>Iberolacerta horvathi</i>      | 1   | 1 |
| Lacertidae | Lacertinae   | <i>Anatololacerta oertzeni</i>    | 1   | 1 |
| Lacertidae | Lacertinae   | <i>Algyroides nigropunctatus</i>  | 1   | 1 |
| Lacertidae | Lacertinae   | <i>Iranolacerta brandtii</i>      | 1   | 1 |
| Lacertidae | Lacertinae   | <i>Darevskia portschinskii</i>    | 1   | 1 |
| Lacertidae | Lacertinae   | <i>Darevskia raddei</i>           | 1   | 1 |

**Table S2:** Primers used for the measurement of relative gene dosage by qPCR.

| <b>Primer name</b> | <b>Forward primer</b>    | <b>Reverse primer</b>     | <b>Amplicon size</b> |
|--------------------|--------------------------|---------------------------|----------------------|
| mecom_1            | AGAGACTTGAGACCGTTACCTTTG | CACTGATGGTGTGCTGGTTTT     | 162                  |
| adarb2_1           | CTGCTGGGAATGCGACTGG      | GCCTTTCGGAGACTGTGGAG      | 175                  |
| smad7_27           | TGTGAAAGGCTGGGGTCAGT     | AAAGCAAGCACTCAGAAGGAGA    | 166                  |
| mars2_1            | TCTTCTGCCCTTGAACCGTC     | GGATGCCCTTGTGAACTACCT     | 200                  |
| lpar4_29           | CACCTCTCCCCATTTGTGATG    | TGCTGCTTTGACCCTTTCGT      | 180                  |
| klhl13_47          | CTGACCACGCAACATAGCA      | CAGAAGGCTCCAATGACCAC      | 183                  |
| mbnl3_1            | GCTGCCTTGATTTTGGCTTG     | CGGGGCGAGAACGACT          | 167                  |
| gab3_5             | CGATGTCTTTGTTGACTTTGTGG  | TGATAATGGAGAGGATGAGGAGAAA | 166                  |
| angptl2_39         | GGCACCCGTCACCTTCTG       | AATGGCTGTCGTGGGAGT        | 166                  |
| hspa5_1            | CCATCACACGCTGGTCAAAG     | GGACTGGACAAAAGGGAGGG      | 163                  |
| lrrc8a_3           | GGAGGCTGAAGATGGAGTGTG    | TCAACAACGAGGGCACCAAG      | 120                  |

**Table S4:** Statistics for the test of the deviations of the gene dose ratios in lacertids and outgroups from the values 0.5 expected for Z-specific genes and 1.0 expected for (pseudo)autosomal genes.

a) lacertids

| Gene              | Mean | Std.Err. | N  | Test against 0.5 |                    | Test against 1.0 |                    |
|-------------------|------|----------|----|------------------|--------------------|------------------|--------------------|
|                   |      |          |    | t-value          | p                  | t-value          | p                  |
| <b>adarb2_2</b>   | 1.03 | 0.02     | 27 | 22.16            | <b>&lt;0.00001</b> | 1.33             | 0.20               |
| <b>smad7_27</b>   | 1.03 | 0.02     | 22 | 23.46            | <b>&lt;0.00001</b> | 1.29             | 0.21               |
| <b>lpar4_29</b>   | 0.55 | 0.04     | 19 | 1.51             | 0.15               | -12.65           | <b>&lt;0.00001</b> |
| <b>klhl13_47</b>  | 0.48 | 0.01     | 26 | -1.86            | 0.08               | -43.46           | <b>&lt;0.00001</b> |
| <b>mars2_1</b>    | 0.53 | 0.03     | 21 | 0.83             | 0.42               | -14.77           | <b>&lt;0.00001</b> |
| <b>gab3_5</b>     | 0.51 | 0.02     | 16 | 0.57             | 0.58               | -20.08           | <b>&lt;0.00001</b> |
| <b>mbnl3_1</b>    | 0.56 | 0.05     | 16 | 1.21             | 0.25               | -9.18            | <b>&lt;0.00001</b> |
| <b>hspa5_1</b>    | 0.64 | 0.07     | 16 | 1.95             | 0.07               | -5.09            | <b>&lt;0.00001</b> |
| <b>lrrc8a_11</b>  | 0.55 | 0.06     | 16 | 0.82             | 0.43               | -8.12            | <b>&lt;0.00001</b> |
| <b>angptl2_39</b> | 0.54 | 0.03     | 12 | 1.23             | 0.24               | -13.58           | <b>&lt;0.00001</b> |

b) outgroups

| Gene             | Mean | Std.Err. | N | Test against 0.5 |                    | Test against 1.0 |      |
|------------------|------|----------|---|------------------|--------------------|------------------|------|
|                  |      |          |   | t-value          | p                  | t-value          | p    |
| <b>adarb2_2</b>  | 0.87 | 0.07     | 2 | 5.62             | 0.11               | -2.08            | 0.29 |
| <b>smad7_27</b>  | 1.00 | 0.08     | 4 | 6.52             | <b>0.01</b>        | 0.00             | 1.00 |
| <b>gab3_5</b>    | 0.93 | 0.06     | 3 | 7.61             | <b>0.02</b>        | -1.17            | 0.36 |
| <b>mbnl3_1</b>   | 1.13 | 0.05     | 4 | 12.79            | <b>0.001</b>       | 2.60             | 0.08 |
| <b>hspa5_1</b>   | 0.96 | 0.03     | 5 | 16.37            | <b>&lt;0.00001</b> | -1.42            | 0.23 |
| <b>lrrc8a_11</b> | 1.11 | 0.04     | 4 | 16.43            | <b>&lt;0.0001</b>  | 3.02             | 0.06 |
